# Supplementary material for: A COMPARATIVE STUDY ON COMPUTED MOTION RESPONSE FOR FLOATING PRODUCTION PLATFORMS: DISCUSSION OF PRACTICAL PROCEDURES
Source: Royal Society of Chemistry journal article supplement (doi:10.1039/c8ra00068a), 1992-01-01
Supplement: c8ra00068a1.pdf [file c8ra00068a1.pdf]

## Supplementary Information

### Heterostructured Ferromagnet-Topological Insulator with Dual-phase Magnetic Properties

Shu-Jui Chang<sup>1</sup>, Pei-Yu Chuang<sup>2</sup>, Cheong-Wei Chong<sup>3</sup>, Yu-Jung Chen<sup>4</sup>, Jung-Chun-Andrew Huang<sup>2,3,4</sup>, Po-Wen Chen,  
and Yuan-Chieh Tseng<sup>1\*</sup>

(1) Dept. Materials Science & Engineering, National Chiao Tung University, Hsinchu, Taiwan.

(2) Dept. Physics, National Cheng Kung University, Tainan, Taiwan.

(3) Advanced Optoelectronic Technology Center, National Cheng Kung University, Tainan, Taiwan.

(4) Taiwan Consortium of Emergent Crystalline Materials, Ministry of Science and Technology, Taipei, Taiwan.

(5) Division of Physics, Institute of Nuclear Energy Research, Taoyuan, Taiwan.

E-mail address: [yctseng21@mail.nctu.edu.tw](mailto:yctseng21@mail.nctu.edu.tw).

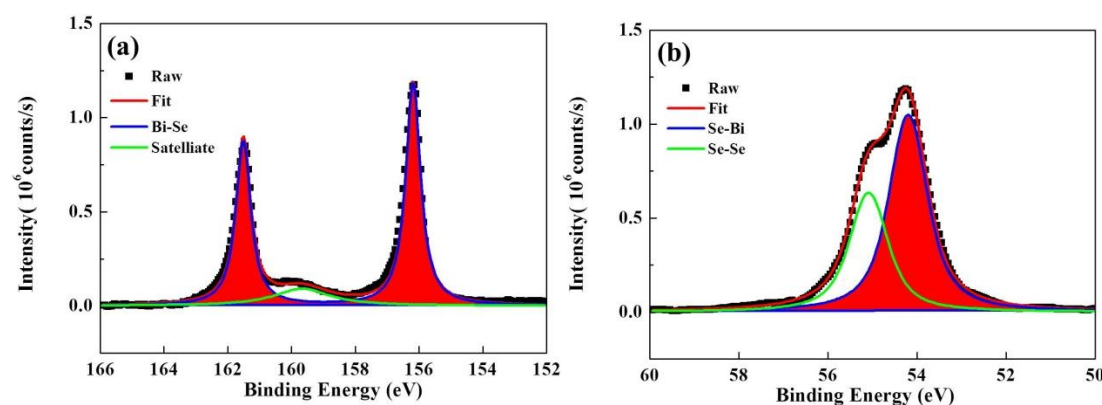

**Fig. S-1** SR-PES spectra of (a) Bi-4*f* and (b) Se-3*d* where highlighted areas are used for Bi/Se ratio calculation, with the use of following equation:

$$n = \frac{I}{S}$$

where

$$S = f\sigma\theta y\lambda AT$$

where  $f$  is the Photon flux of the x-ray,  $\sigma$  is the photoionization cross-section of peak of element,  $\theta$  is the photoelectron emission angle,  $y$  is the photoelectron yield,  $\lambda$  is the inelastic electron mean-free path,  $A$  is analysis area and  $T$  is a analyzer transmission function. Here, we define  $S$  is the sensitivity factor of core level of element.

Hence,  $n$  is dependent on the peak area and sensitivity factor.

$$\frac{n_1}{n_2} = \frac{(I_1/S_1)}{(I_2/S_2)} \quad (1)$$

The calculated Bi/Se ratio is 1.49 very close to the ideal stoichiometry of  $\text{Bi}_2\text{Se}_3$  formula.

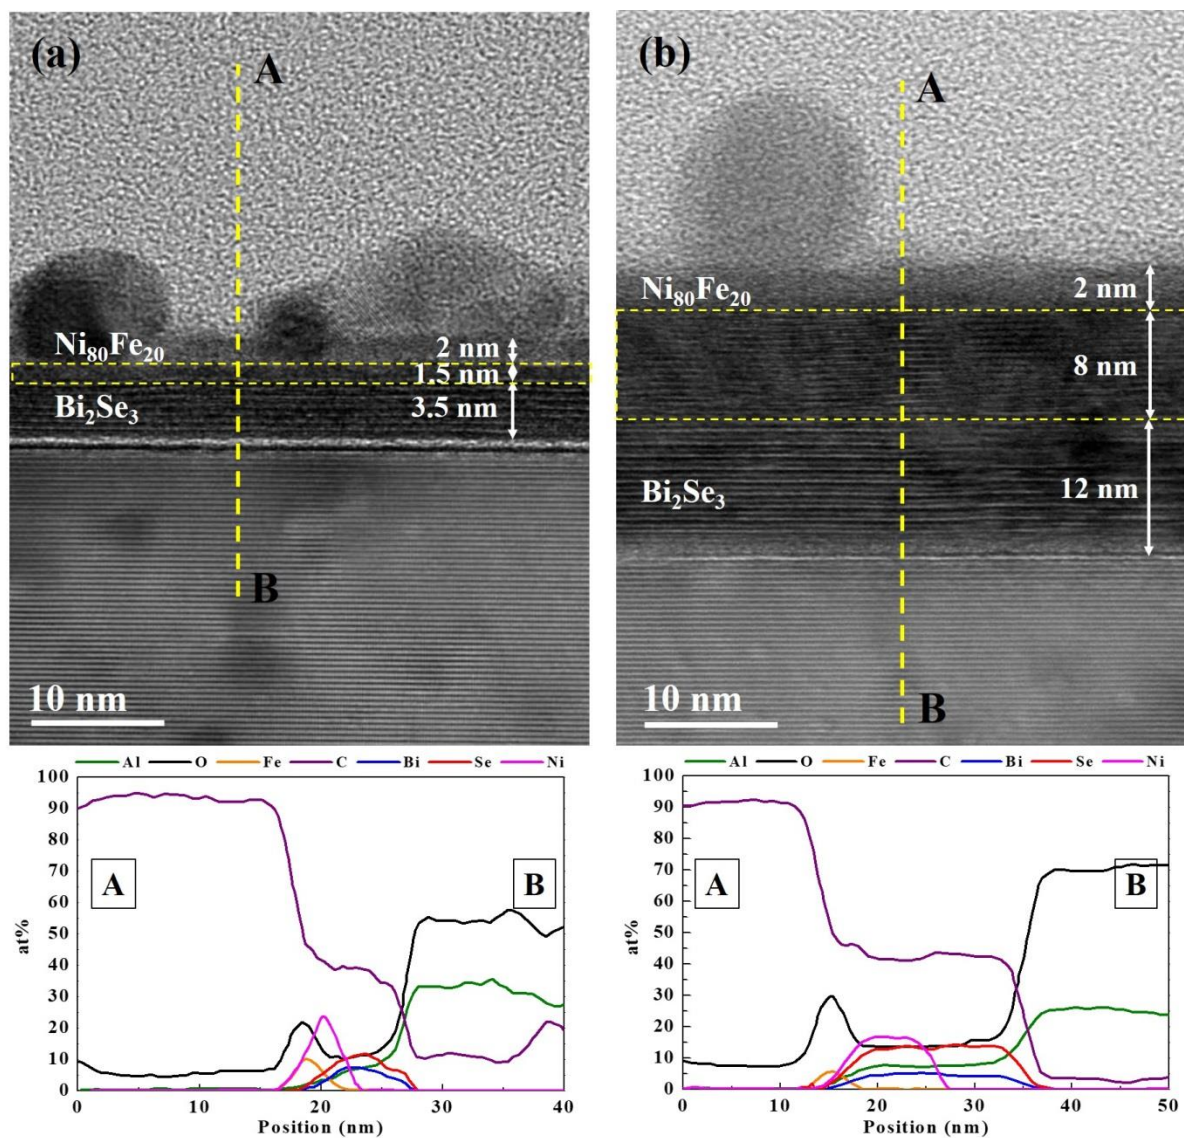

**Fig. S-2** Cross-sectional TEM images of (a)  $\text{Py}/\text{Bi}_2\text{Se}_3$ -5nm and (b)  $\text{Py}/\text{Bi}_2\text{Se}_3$ -20 nm samples. EDX analyses are shown below the corresponding TEM images, where EDX line-scanning was performed along the yellow dashed line which starts from A and ends at B. EDX shows Ni diffusion into  $\text{Bi}_2\text{Se}_3$  and it formed an Ni-Se overlapping region.

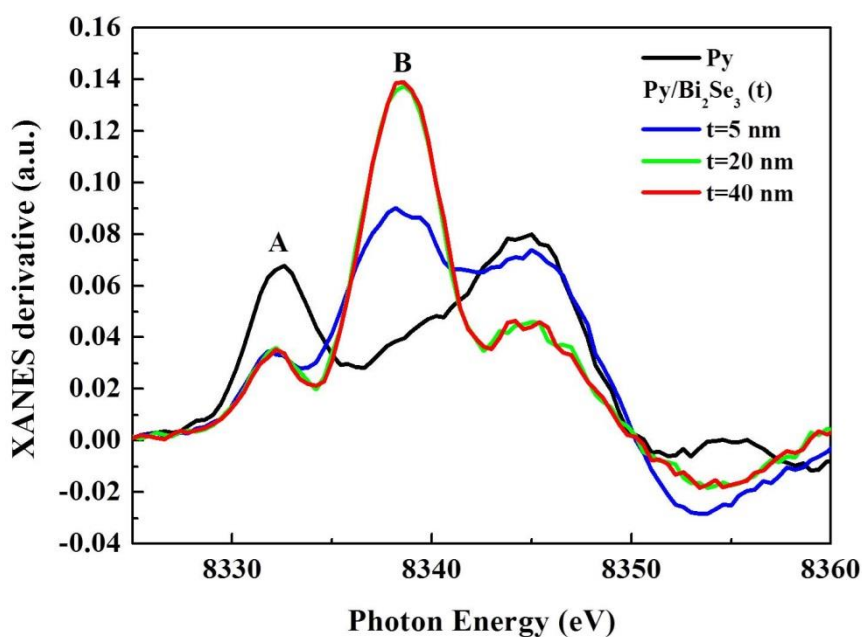

**Fig. S-3** Differentiation of Ni *K*-edge XANES for pure Py (black), Py/Bi<sub>2</sub>Se<sub>3</sub>-5nm, Py/Bi<sub>2</sub>Se<sub>3</sub>-20nm and Py/Bi<sub>2</sub>Se<sub>3</sub>-40nm samples. The edge characteristics can be decomposed into feature A and B upon differentiation. Feature A is allowed by quadrupole selection rules. The weak intensity corresponds to a quadrupole  $1s \rightarrow 3d$  dipole-forbidden transitions as a characteristic of chemical environment in Ni valency in which the intensity strongly depends upon the coordination symmetry. Feature A becomes less intense in Ni:Bi<sub>2</sub>Se<sub>3</sub> as compared to Py, suggesting a local-structural change to centro-symmetry in coordination [1-3]. Feature B is attributed to the  $1s \rightarrow 4p$  transition, which arises from a chalcogen-based charge-transfer and indicates the presence of strong Ni-Se covalent bonds. Feature B is intensified with the increase of Bi<sub>2</sub>Se<sub>3</sub> thickness, implying a more stabilized phase of Ni:Bi<sub>2</sub>Se<sub>3</sub>. On the contrary, feature B is heavily suppressed in pure Py, which is a straightforward indicator to the absence of Ni:Bi<sub>2</sub>Se<sub>3</sub>.

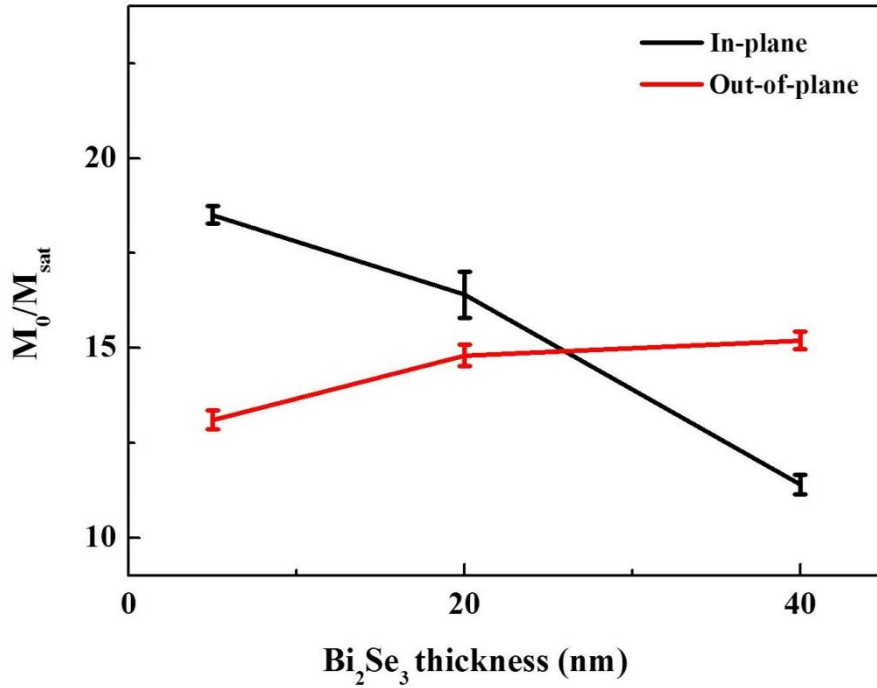

**Fig. S-4** The dependence of remanence ratios ( $M_0/M_{sat}$ ) on  $\text{Bi}_2\text{Se}_3$  thickness, for in-plane and out-of-plane directions.  $M_0/M_{sat}$  was estimated from M-H curves.

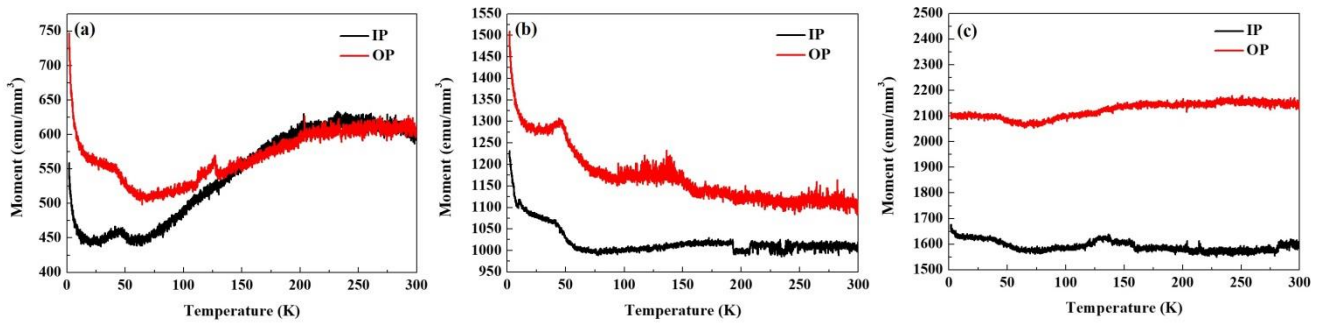

**Fig. S-5** The temperature dependence of magnetization of (a)  $\text{Py}/\text{Bi}_2\text{Se}_3$ -5 nm, (b)  $\text{Py}/\text{Bi}_2\text{Se}_3$ -20 nm, (c)  $\text{Py}/\text{Bi}_2\text{Se}_3$ -40 nm, for in-plane (black) and out-of-plane (red) directions.

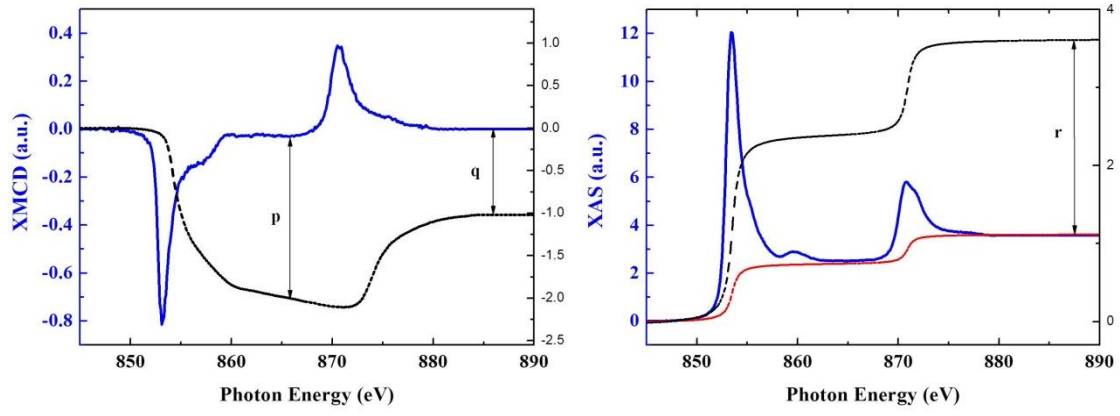

**Fig. S-6** (left) Ni-XMCD and (right) Ni-XAS integrations applied in sum-rules analysis for the calculation of Ni's  $\Delta E_{SO}$ . The orbital ( $m_{orb}$ ) and spin ( $m_{spin}$ ) moments are obtained by following equations:

$$m_{orb} = -4q(10 - n_{3d}) / 3r \quad (1)$$

$$m_{spin} = -(6p - 4q)(10 - n_{3d}) / r \quad (2)$$

Where

$$q = \int_{L3+L2} (\mu_+ - \mu_-) d\omega$$

$$r = \int_{L3+L2} (\mu_+ + \mu_-) d\omega$$

$$p = \int_{L3} (\mu_+ - \mu_-) d\omega$$

where  $\mu_+ / \mu_-$  is the x-ray absorption intensity with left/right circular polarization;  $n_{3d}$  is the number of 3d electron per cation and the  $p$ ,  $q$  and  $r$  are integrated values obtained from XMCD and XAS.

The calculated Ni  $m_{orb}$  are 0.02, 0.018 and 0.01 for Py/Bi<sub>2</sub>Se<sub>3</sub>-5 nm, Py/Bi<sub>2</sub>Se<sub>3</sub>-20 nm, and Py/Bi<sub>2</sub>Se<sub>3</sub>-40 nm, respectively, along in-plane direction, which is denoted  $m_{orb}^{\parallel}$

Ni  $m_{orb}$  are 0.07, 0.07, 0.06 for Py/Bi<sub>2</sub>Se<sub>3</sub>-5 nm, Py/Bi<sub>2</sub>Se<sub>3</sub>-20 nm, and Py/Bi<sub>2</sub>Se<sub>3</sub>-40 nm, respectively, for out-of-plane direction, which is denoted  $m_{orb}^{\perp}$ .

In a simple model of Bruno [4][5], a relation between  $m_{orb}$  and  $\Delta E_{SO}$  is derived as:

$$E_{SO} = -\frac{1}{2} \frac{\xi}{2\mu_B} [m_{orb}^{\perp} + (m_{orb}^{\parallel} - m_{orb}^{\perp}) \sin^2 \theta]$$

The energy difference for the magnetization aligned along out-of-plane and in-plane directions is:

$$\Delta E_{SO} = E_{SO}(\theta = 0^\circ) - E_{SO}(\theta = 90^\circ)$$

$$\Delta E_{SO} = -\frac{1}{2} \frac{\xi}{2\mu_B} [m_{orb}^{\perp} - m_{orb}^{\parallel}]$$

where  $\xi$  is spin-orbit coupling parameter for 3d electron and the values of  $m_{orb}^{\perp}$  and  $m_{orb}^{\parallel}$  are obtained by

sum-rules [6] along the out-of- and in-plane directions, respectively.

The calculated  $m_{orb}^{\parallel} - m_{orb}^{\perp}$  values are 0.02795, 0.02907 and 0.02795, for Py/Bi<sub>2</sub>Se<sub>3</sub>-5 nm, Py/Bi<sub>2</sub>Se<sub>3</sub>-20 nm, and Py/Bi<sub>2</sub>Se<sub>3</sub>-40 nm, respectively.

The same method was used in the calculation of Fe's  $\Delta E_{SO}$ .

## References

- [1] F. E. Huggins, K. C. Galbreath, K. E. Eylands, L. L. Van Loon, J. A. Olson, E. J. Zillioux, S. G. Ward, P. A. Lynch, and P. Chu, Determination of nickel species in stack emissions from eight residual oil-fired utility steam-generating units, *Environ. Sci. Technol.* **45**, 6188 (2011).
- [2] A. Kisiel, P. Zajdel, P. M. Lee, E. Burattini, and W. Giriat, XANES study of K edges of Fe, Co, Ni, and Se in transition metal selenides. Experiment and comparison with LMTO numerical calculations, *J. Alloys Compd.* **286**, 61 (1999).
- [3] S. A. Yao, V. Martin-Diaconescu, I. Infante, K. M. Lancaster, A. W. Gotz, S. DeBeer, and J. F. Berry, Electronic structure of Ni<sub>2</sub>E complexes (E = S, Se, Te) and a global analysis of M<sub>2</sub>E<sub>2</sub> compounds: a case for quantized E<sub>2</sub><sup>n-</sup> oxidation levels with n = 2, 3, or 4, *J. Am. Chem. Soc.* **137**, 4993 (2015).
- [4] D. Weller, Y. Wu, J. Stöhr, M. G. Samant, B. D. Hermsmeier, and C. Chappert, Orbital magnetic moments of Co in multilayers with perpendicular magnetic anisotropy, *Phys. Rev. B* **49**, 12888 (1994).
- [5] J. Stöhr, Exploring the microscopic origin of magnetic anisotropies with X-ray magnetic circular dichroism (XMCD) spectroscopy, *J. Magn. Magn. Mater.* **200**, 470 (1999).
- [6] P. Bruno, Tight-binding approach to the orbital magnetic moment and magnetocrystalline anisotropy of transition-metal monolayers, *Phys. Rev. B* **39**, 865 (1989).
